# Supplementary material for: Dimensions of Oppositional Defiant Disorder in Young Children: Heterotypic Continuity with Anxiety and Depression
Source: Springer Nature journal article supplement (doi:10.1007/s10802-014-9853-1), 2014-02-05
Supplement: MOESM1 [file 542100]

Table 1 *Correlations between manifest indicators*

|  | 1 | 2 | 3 | 4 | 5 | 6 | 7 | 8 | 9 | 10 | 11 | 12 | 13 | 14 | 15 |
| --- | --- | --- | --- | --- | --- | --- | --- | --- | --- | --- | --- | --- | --- | --- | --- |
| 1. Touchy: age 4 | 1 |  |  |  |  |  |  |  |  |  |  |  |  |  |  |
| 2. Angry: age 4 | .64** | 1 |  |  |  |  |  |  |  |  |  |  |  |  |  |
| 3. Get even: age 4 | .41** | .46** | 1 |  |  |  |  |  |  |  |  |  |  |  |  |
| 4. Temper: age 4 | .43** | .47** | .39** | 1 |  |  |  |  |  |  |  |  |  |  |  |
| 5. Argues: age 4 | .36** | .35** | .27** | .50** | 1 |  |  |  |  |  |  |  |  |  |  |
| 6. Defies: age 4 | .40** | .42** | .43** | .48** | .52** | 1 |  |  |  |  |  |  |  |  |  |
| 7. Annoys: age 4 | .38** | .36** | .52** | .37** | .30** | .47** | 1 |  |  |  |  |  |  |  |  |
| 8. Blames: age 4 | .30** | .29** | .37** | .28** | .23** | .31** | .35** | 1 |  |  |  |  |  |  |  |
| 9. CSI generalized anxiety: age 4 | .43** | .41** | .33** | .35** | .31** | .44** | .29** | .29** | 1 |  |  |  |  |  |  |
| 10. DISC-YC generalized anxiety: age 4 | .29** | .29** | .21** | .18** | .15** | .17** | .17** | .23** | .44** | 1 |  |  |  |  |  |
| 11. CSI separation anxiety: age 4 | .34** | .34** | .27** | .23** | .21** | .27** | .19** | .24** | .55** | .36** | 1 |  |  |  |  |
| 12. CSI major depression: age 4 | .45** | .45** | .36** | .27** | .24** | .31** | .26** | .25** | .63** | .46** | .50** | 1 |  |  |  |
| 13. DISC-YC major depression: age 4 | .41** | .39** | .31** | .27** | .21** | .30** | .27** | .25** | .56** | .59** | .38** | .60** | 1 |  |  |
| 14. CSI dysthymia: age 4 | .44** | .45** | .36** | .26** | .24** | .31** | .28** | .23** | .63** | .43** | .50** | .93** | .57** | 1 |  |
| 15. Touchy: age 5 | .40** | .36** | .25** | .25** | .19** | .29** | .17** | .19** | .26** | .20** | .20** | .25** | .25** | .22** | 1 |
| 16. Angry: age 5 | .30** | .35** | .24** | .25** | .17** | .23** | .16** | .13** | .25** | .08* | .23** | .24** | .20** | .22** | .54** |
| 17. Get even: age 5 | .20** | .29** | .40** | .27** | .21** | .26** | .34** | .25** | .21** | .13** | .18** | .19** | .20** | .20** | .30** |
| 18. Temper: age 5 | .28** | .26** | .24** | .48** | .34** | .30** | .22** | .15** | .24** | .07* | .11** | .10** | .17** | .12** | .31** |
| 19. Argues: age 5 | .23** | .23** | .18** | .34** | .43** | .31** | .19** | .08* | .26** | 0.06 | .17** | .12** | .15** | .15** | .21** |
| 20. Defies: age 5 | .27** | .29** | .26** | .34** | .36** | .42** | .28** | .22** | .30** | .08* | .22** | .20** | .20** | .21** | .24** |
| 21. Annoys: age 5 | .21** | .20** | .28** | .23** | .16** | .26** | .42** | .19** | .14** | .09** | 0.04 | .11** | .16** | .13** | .30** |
| 22. Blames: age 5 | .14** | .17** | .21** | .22* | .16** | .22** | .26** | .37** | .21** | .16** | .19** | .15** | .21** | .16** | .30** |

Table 1 (cont)

|  | 1 | 2 | 3 | 4 | 5 | 6 | 7 | 8 | 9 | 10 | 11 | 12 | 13 | 14 | 15 |
| --- | --- | --- | --- | --- | --- | --- | --- | --- | --- | --- | --- | --- | --- | --- | --- |
| 23. CSI generalized anxiety: age 5 | .38** | .32** | .26** | .29** | .27** | .31** | .24** | .26** | .59** | .33* | .37** | .38** | .38** | .35** | .40** |
| 24. DISC-YC generalized anxiety: age 5 | .22** | .22** | .18** | .13** | .09* | .15** | .14** | .22** | .39** | .51** | .27** | .40** | .45** | .37** | .26** |
| 25. CSI separation anxiety: age 5 | .24** | .23** | .17** | .17** | .17** | .18** | .09** | .16** | .37** | .21** | .53** | .27** | .22** | .25** | .21** |
| 26. CSI major depression: age 5 | .34** | .34** | .24** | .17** | .15** | .24** | .19** | .16** | .42** | .34** | .33** | .48** | .40** | .44** | .38** |
| 27. DISC-YC major depression: age 5 | .26** | .26** | .22** | .19** | .15** | .23** | .21** | .20** | .42** | .44** | .28** | .45** | .57** | .41** | .29** |
| 28. CSI dysthymia: age 5 | .36** | .36** | .25** | .19** | .20** | .24** | .21** | .14** | .42** | .34** | .33** | .45** | .40** | .43** | .41** |
| 29. Touchy: age 6-7 | .30** | .29** | .23** | .28** | .18** | .21** | .20** | .15** | .22** | .12** | .17** | .16** | .19** | .16** | .40** |
| 30. Angry: age 6-7 | .30** | .37** | .26** | .32** | .25** | .25** | .22** | .14** | .25** | .12** | .15** | .21** | .17** | .21** | .34** |
| 31. Get even: age 6-7 | .20** | .21** | .37** | .26** | .20** | .27** | .30** | .29** | .20** | .10** | .19** | .19** | .18** | .18** | .27** |
| 32. Temper: age 6-7 | .28** | .30** | .26** | .50** | .36** | .38** | .29** | .20** | .27** | .12** | .14** | .20** | .23** | .20** | .29** |
| 33. Argues: age 6-7 | .21** | .23** | .20** | .33** | .41** | .31** | .21** | .12** | .23** | .11** | .17** | .14** | .15** | .16** | .20** |
| 34. Defies: age 6-7 | .24** | .28** | .28** | .33** | .30** | .396** | .25** | .21** | .29** | .12** | .20** | .19** | .20** | .18** | .21** |
| 35. Annoys: age 6-7 | .19** | .18** | .28** | .23** | .20** | .25** | .38** | .22*** | .13** | .07** | .10** | .13** | .13** | .11** | .23** |
| 36. Blames: age 6-7 | .21** | .20** | .20** | .26** | .22** | .24** | .25** | .34** | .19** | .17** | .17** | .17** | .19** | .18** | .18** |
| 37. CSI generalized anxiety: age 6-7 | .31** | .31* | .26** | .30** | .24** | .33** | .22** | .24** | .52** | .26** | .33** | .33** | .32** | .33** | .31** |
| 38. DISC-YC generalized anxiety: age 6-7 | .25** | .26** | .20* | .18* | .15** | .17** | .15** | .26** | .40** | .41* | .38** | .39** | .37** | .36** | .17** |
| 39. CSI separation anxiety: age 6-7 | .17** | .19** | .13** | .08* | 0.04 | .11** | .07* | .14** | .30** | .17** | .42** | .23** | .15** | .23** | .16** |
| 40. CSI major depression: age 6-7 | .32** | .31** | .28* | .25** | .19** | .26** | .21** | .23** | .42** | .29** | .30** | .44** | .35** | .39** | .32** |
| 41. DISC-YC major depression: age 6-7 | .25** | .26** | .24** | .21** | .119** | .24** | .23** | .24** | .41*** | .34** | .26** | .43** | .53** | .39** | .20** |
| 42. CSI dysthymia: age 6-7 | .32** | .32** | .30** | .26** | .20** | .27** | .20** | .21** | .42** | .28** | .30** | .42** | .34** | .41** | .32** |

Table 1 (cont)

|  | 16 | 17 | 18 | 19 | 20 | 21 | 22 | 23 | 24 | 25 | 26 | 27 | 28 | 29 | 30 |
| --- | --- | --- | --- | --- | --- | --- | --- | --- | --- | --- | --- | --- | --- | --- | --- |
| 16. Angry: age 5 | 1 |  |  |  |  |  |  |  |  |  |  |  |  |  |  |
| 17. Get even: age 5 | .38** | 1 |  |  |  |  |  |  |  |  |  |  |  |  |  |
| 18. Temper: age 5 | .35** | .27** | 1 |  |  |  |  |  |  |  |  |  |  |  |  |
| 19. Argues: age 5 | .32** | .25** | .57** | 1 |  |  |  |  |  |  |  |  |  |  |  |
| 20. Defies: age 5 | .28** | .35** | .43** | .51** | 1 |  |  |  |  |  |  |  |  |  |  |
| 21. Annoys: age 5 | .30** | .45** | .30** | .26** | .34** | 1 |  |  |  |  |  |  |  |  |  |
| 22. Blames: age 5 | .33* | .35** | .23** | .20** | .27** | .34** | 1 |  |  |  |  |  |  |  |  |
| 23. CSI generalized anxiety: age 5 | .37** | .25** | .34** | .22** | .25** | .18** | .26** | 1 |  |  |  |  |  |  |  |
| 24. DISC-YC generalized anxiety: age 5 | .18** | .11** | .14** | 0.05 | .15** | 0.06 | 0.18 | .48** | 1 |  |  |  |  |  |  |
| 25. CSI separation anxiety: age 5 | .27** | .14** | .18** | .10** | .13** | 0.006 | .17** | .50** | .30** | 1 |  |  |  |  |  |
| 26. CSI major depression: age 5 | .39** | .22** | .20** | .15** | .21** | .21** | .20** | .56** | .43** | .35** | 1 |  |  |  |  |
| 27. DISC-YC major depression: age 5 | .29** | .17** | .17** | .10** | .17** | .17** | .22** | .43** | .57** | .22** | .55** | 1 |  |  |  |
| 28. CSI dysthymia: age 5 | .43** | .23** | .25** | .17** | .20** | .20** | .22** | .57** | .45** | .54** | .91** | .54** | 1 |  |  |
| 29. Touchy: age 6-7 | .34** | .26** | .25** | .20* | .23** | .22** | .21** | .26** | .15** | .14** | .18** | .16** | .22** | 1 |  |
| 30. Angry: age 6-7 | .39** | .27** | .29** | .25** | .28** | .24** | .20** | .37** | .18** | .27** | .39** | .29** | .43** | .34** | 1 |
| 31. Get even: age 6-7 | .28** | .49** | .24** | .22** | .29** | .34** | .25** | .25** | .11** | .14** | .22** | .17** | .23** | .30** | .38** |
| 32. Temper: age 6-7 | .27** | .32** | .50** | .41** | .37** | .32** | .24** | .27** | .11** | .11** | .18** | .17** | .21** | .40** | .41** |
| 33. Argues: age 6-7 | .22** | .24** | .40** | .53** | .38** | .22** | .17** | .22** | 0.02 | .10** | .15** | .10** | .17** | .32** | .32** |
| 34. Defies: age 6-7 | .25** | .34** | .33** | .36** | .51** | .25** | .23** | .25** | .07* | .13** | .21** | .17** | .20** | .32** | .34** |
| 35. Annoys: age 6-7 | .16** | .34** | .22** | .24** | .28** | .49** | .23** | .14** | 0.02 | 0.04 | .08** | .08* | .09** | .29** | .34** |
| 36. Blames: age 6-7 | .15** | .30** | .26** | .24** | .25** | .24** | .40** | .22** | .13** | .16** | .08* | .12** | .12** | .28** | .24** |
| 37. CSI generalized anxiety: age 6-7 | .29** | .20** | .27** | .32** | .37** | .17** | .20** | .43** | .35** | .34** | .40** | .32** | .40** | .38** | .33** |
| 38. DISC-YC generalized anxiety: age 6-7 | .20** | .12** | .16** | .14** | .18** | 0.04 | .13** | .43** | .55** | .36** | .36** | .36** | .39** | .22** | .17** |
| 39. CSI separation anxiety: age 6-7 | .14** | .07* | .09* | .07* | .11** | 0.02 | .11** | .32** | .24** | .58** | .25** | .19** | .24** | .17** | .18** |
| 40. CSI major depression: age 6-7 | .29** | .20** | .17** | .27** | .30** | .13** | .15** | .40** | .33** | .32* | .46** | .35** | .47** | .343** | .40** |
| 41. DISC-YC major depression: age 6-7 | .22** | .20** | .09** | .16** | .26** | .13** | .21** | .32** | .39** | .16** | .35** | .48** | .38** | .33** | .28** |
| 42. CSI dysthymia: age 6-7 | .30** | .20** | .19** | .29** | .30** | .14** | .15** | .36** | .32** | .31** | .43** | .33** | .46** | .37** | .42** |

Table 1 (cont)

|  | 31 | 32 | 33 | 34 | 35 | 36 | 37 | 38 | 39 | 40 | 41 | 42 |
| --- | --- | --- | --- | --- | --- | --- | --- | --- | --- | --- | --- | --- |
| 31. Get even: age 6-7 | 1 |  |  |  |  |  |  |  |  |  |  |  |
| 32. Temper: age 6-7 | .40** | 1 |  |  |  |  |  |  |  |  |  |  |
| 33. Argues: age 6-7 | .34** | .56** | 1 |  |  |  |  |  |  |  |  |  |
| 34. Defies: age 6-7 | .42** | .51** | .55** | 1 |  |  |  |  |  |  |  |  |
| 35. Annoys: age 6-7 | .43** | .36** | .39** | .40** | 1 |  |  |  |  |  |  |  |
| 36. Blames: age 6-7 | .37** | .34** | .31** | .33** | .39** | 1 |  |  |  |  |  |  |
| 37. CSI generalized anxiety: age 6-7 | .28** | .38** | .32** | .37** | .19** | .30** | 1 |  |  |  |  |  |
| 38. DISC-YC generalized anxiety: age 6-7 | .14** | .18** | .14** | .18** | 0.05 | .18** | .48** | 1 |  |  |  |  |
| 39. CSI separation anxiety: age 6-7 | .12** | .09** | .07* | .11** | 0.04 | .13** | .45** | .37** | 1 |  |  |  |
| 40. CSI major depression: age 6-7 | .32** | .33** | .27** | .30** | .23** | .22** | .48** | .51** | .26** | 1 |  |  |
| 41. DISC-YC major depression: age 6-7 | .24** | .25** | .16** | .26** | .17** | .21** | .48** | .51** | .26** | .52** | 1 |  |
| 42. CSI dysthymia: age 6-7 | .32** | .33** | .29** | .30** | .22** | .22** | .61** | .47** | .38** | .94** | .52** | 1 |

Note: *P < .05; **P < .01
